# Supplementary material
Source: PubMed Central journal article supplement (PMC9722542)
Supplement: NIHMS1828466-supplement-Table_S1.pdf [file NIHMS1828466-supplement-Table_S1.pdf]

Supplemental Table 1. Prevalence of opioid use disorder medication treatment of primary care patients with an opioid use disorder diagnosis across subgroups based on comorbid mental health and other substance use disorder diagnoses

|                                        | No mental health diagnoses<br>or other substance use<br>disorder |                       | Other substance use<br>disorder only |                       | Mental health diagnosis<br>only |                       | Both mental health<br>diagnoses and other<br>substance use disorder |                       |
|----------------------------------------|------------------------------------------------------------------|-----------------------|--------------------------------------|-----------------------|---------------------------------|-----------------------|---------------------------------------------------------------------|-----------------------|
|                                        | N= 1,605                                                         |                       | N= 1,091                             |                       | N= 4,530                        |                       | N=6,753                                                             |                       |
|                                        | Females                                                          | Males                 | Females                              | Males                 | Females                         | Males                 | Females                                                             | Males                 |
|                                        | n=696                                                            | n=909                 | n=306                                | n=785                 | n=2,969                         | n=1,561               | n=3,460                                                             | n=3,293               |
|                                        | %*<br>(95% Confidence Interval)                                  |                       |                                      |                       |                                 |                       |                                                                     |                       |
| Any opioid use disorder<br>treatment** | 20.7<br>(17.8 - 23.5)                                            | 22.5<br>(20.1 - 25.0) | 23.8<br>(19.9 - 27.6)                | 24.7<br>(22.2 - 27.2) | 15.0<br>(13.7 - 16.3)           | 20.1<br>(18.2 - 22.0) | 20.5<br>(19.2 - 21.7)                                               | 22.9<br>(21.6 - 24.2) |
| Buprenorphine                          | 20.4<br>(17.6 - 23.3)                                            | 22.4<br>(19.9 - 24.8) | 23.6<br>(19.7 - 27.5)                | 24.1<br>(21.7 - 26.6) | 14.9<br>(13.5 - 16.2)           | 19.8<br>(17.9 - 21.6) | 19.8<br>(18.6 - 21.0)                                               | 22.1<br>(20.8 - 23.3) |
| Injectable XR naltrexone               | 0.6<br>(0.02 - 1.3)                                              | 0.2<br>(0 - 0.6)      | 0.6<br>(0 - 1.3)                     | 1.5<br>(0.7 - 2.2)    | 0.2<br>(0 - 0.4)                | 0.5<br>(0.1 - 0.8)    | 1.5<br>(1.1 - 1.9)                                                  | 1.6<br>(1.1 - 2.0)    |

\*Prevalence estimates (and 95% CIs) – adjusted for health system, age, and race-ethnicity – were obtained by fitting a logistic regression model and then applying marginal standardization

\*\* defined as 1+ prescription or procedure code for buprenorphine formulations used to treat opioid use disorder (transmucosal, implants, sustained injection) and/or injectable XR naltrexone throughout the health system

Abbreviations: XR – extended release
